# Supplementary material for: Evaluation of Eosin-Methylene Blue as a Photosensitizer for Larval Control of Aedes aegypti by a Photodynamic Process
Source: PubMed Central journal article supplement (PMC6163889; doi:10.3390/insects9030109), 2018-08-30
Supplement: insects-09-00109-s001.pdf [file insects-09-00109-s001.pdf]

## Evaluation of Eosin-Methylene Blue as a Photosensitizer for Larval Control of *Aedes aegypti* by a Photodynamic Process

Alessandra R. Lima <sup>1,2</sup>, Cicera M. Silva <sup>1,2</sup>, Cynthia S. A. Caires <sup>3</sup>, Esmael D. Prado <sup>2</sup>,  
Luciana R. P. Rocha <sup>2</sup>, Isaias Cabrini <sup>2</sup>, Eduardo J. Arruda <sup>2</sup>, Samuel L. Oliveira <sup>1</sup>  
and Anderson R. L. Caires <sup>1,\*</sup>

<sup>1</sup> Grupo de Óptica e Fotônica, Instituto de Física, Universidade Federal de Mato Grosso do Sul, CP 549, 79070-900 Campo Grande, MS, Brazil

<sup>2</sup> Faculdade de Ciências Exatas e Tecnologia, Universidade Federal da Grande Dourados, CP 533, 79804-970 Dourados, MS, Brazil

<sup>3</sup> Grupo de Espectroscopia e Bioinformática Aplicados a Biodiversidade e a Saúde, Faculdade de Medicina, CP 549, 79070-900 Campo Grande, MS, Brazil

\* Correspondence: anderson.caires@ufms.br; Tel.: +55-67-3345-7030

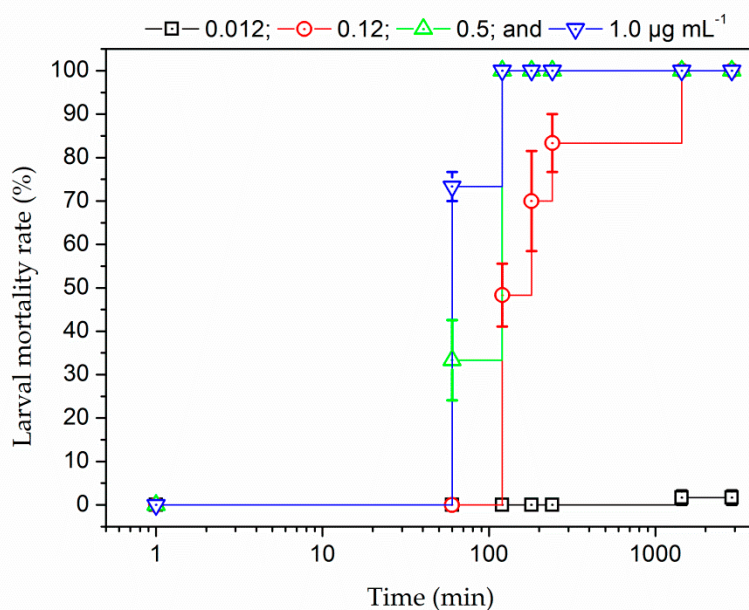

**Figure S1.** Larval mortality rate as a function of time induced by Temephos at different concentrations: (#) 0.012, (.) 0.12, (9) 0.5, ( $\Delta$ ) 1.0  $\mu\text{g mL}^{-1}$ . Error bars represent SE.
